# Supplementary material for: Influence of Laser Energy Input and Shielding Gas Flow on Evaporation Fume during Laser Powder Bed Fusion of Zn Metal
Source: MDPI journal article supplement (doi:10.3390/ma14102677), 2021-05-20
Supplement: s1 [file s1]

Table 1 Thermal physical parameters used in simulation

| Parameters                  | Unit           | Zn                                                                                            | TC4                                      |
|-----------------------------|----------------|-----------------------------------------------------------------------------------------------|------------------------------------------|
| Density                     | $kg/m^3$       | 740(293.15K); 6553(700K);<br>6508(750K); 6464(800K);<br>6420(850K); 6376(900K);<br>6332(950K) | 4440                                     |
| Specific heat capacity      | $J/kg \cdot K$ | $[22.4+0.0105 \cdot T(298-692.7K)]/0.065$ ;<br>483.1(692.7-1180.15K);<br>320(>1180.15K)       | 611(293.15K); 713(873K);<br>771(1473K)   |
| Thermal conductivity        | $W/m \cdot K$  | 113(293.15K); 96(683.65K);<br>61(692.65K); 57(1023.15K)                                       | 6.8(293K); 13.7(873K)<br>21.7(1473K)     |
| Viscosity                   | $kg/m \cdot s$ | 0.003737(700K);<br>0.002883(800K)<br>0.002356(900K)<br>0.002005(1000K)<br>0.001756(1100K)     | 0.005                                    |
| Molar mass                  | $kg/mol$       | 65                                                                                            | 411                                      |
| Heat of fusion              | $J/kg$         | 100900                                                                                        | 6340000                                  |
| Thermal expansion           | $1/K$          | $0.89 \cdot 10^{-6}(293-673K)$                                                                | 0.0001                                   |
| Melting point               | $K$            | 692.65                                                                                        | 1928                                     |
| Boiling point               | $K$            | 1180.15                                                                                       | 3375                                     |
| Surface tension             | $mN/m$         | 782(692.65K); 755(723.15K);<br>751(773.15K)                                                   | $1.68-(2.6 \cdot 0.0001) \cdot (T-1878)$ |
| Surface tension coefficient | -              | 0.0004                                                                                        | 0.00026                                  |
| Laser absorptivity          | -              | 36%(Bulk); 73%(Powder)                                                                        | 73%(Powder)                              |
| Latent heat of vaporation   | $kJ/mol$       | 115.3                                                                                         | 12.9                                     |
